# Supplementary material for: Computer aided analysis of additional chromosome aberrations in Philadelphia chromosome positive acute lymphoblastic leukaemia using a simplified computer readable cytogenetic notation
Source: Springer Nature journal article supplement (doi:10.1186/1471-2105-4-4), 2003-01-28
Supplement: Additional file 2 [file 1471-2105-4-4-s2.doc]

# Glossary of cytogenetic terms

centromeric chromosome region: chromosome region which includes the primary chromosome constriction and adjacent chromosome bands

chromosome aberration, additional: chromosome aberration which succeeds a pre-existing karyotype abnormality

chromosome aberration, numerical: gain or loss of a whole chromosome

chromosome aberration, structural: all types of chromosome rearrangements which lead to a change of the chromosome morphology and/or banding pattern.

deletion: loss of a part of a chromosome.

dicentric translocation: translocation of two chromosomes leading to a new chromosome with two centromeres

diploid: double set of chromosomes (46)

haploid: single set of chromosomes (23)

hyperdiploid number of chromosomes > 46

hyperdiploid, high-: number of chromosomes > 50

inversion: a chromosome segment of at least two bands was inverted by 180° and refitted at the same position of the chromosome.

isochromosome: chromosome consisting of two identical copies of the long or short arm

modal number: the most common chromosome number in a tumour cell population

Philadelphia chromosome: derivative chromosome 22 resulting from a t(9;22)(q34;q11)

Philadelphia positive: karyotype containing a Philadelphia chromosome

ploidy level: level of the integer multiple of the single chromosome set (haploid, diploid, triploid, etc.)

polyploidy: multiplication of the chromosome set.

secondary chromosome anomalies: synonym to: additional chromosome aberrations

translocation, balanced: reciprocal exchange of chromosomal material between two or more chromosomes

translocation, unbalanced: exchange of chromosomal material between two or more chromosomes leading to a loss of chromosomal material
